# Supplementary material for: A spontaneous mitonuclear epistasis converging on Rieske Fe-S protein exacerbates complex III deficiency in mice
Source: PubMed Central journal article supplement (PMC6965120; doi:10.1038/s41467-019-14201-2), 2020-01-16
Supplement: 41467_2019_14201_MOESM1_ESM.pdf [file 41467_2019_14201_MOESM1_ESM.pdf]

Supplementary information

**A spontaneous mitonuclear epistasis converging on Rieske Fe-S protein exacerbates complex III deficiency in mice**

Purhonen et al.

**Supplementary Table 1. A mtDNA variant and seven homozygous nDNA coding-region variants identified from C57BL/6JBomTac-derived in-house strain using whole genome sequences (C57BL/6JCrI as reference)**

| Gene              | Full name                                                                | Identifier         | Type of variant      | Chromosome | Exon | Nucleotide   | Amino acid |
|-------------------|--------------------------------------------------------------------------|--------------------|----------------------|------------|------|--------------|------------|
| <i>mt-Cyb</i>     | Cytochrome b                                                             | ENSMUSG00000064370 | Nonsynonymous        | mtDNA      |      | G760A        | D254N      |
| <i>Prex2</i>      | Phosphatidylinositol-3,4,5-Trisphosphate-Dependent Rac Exchange Factor 2 | ENSMUSG00000048960 | Nonsynonymous        | 1          | 6    | G533A        | R178Q      |
| <i>Taar2</i>      | Trace Amine Associated Receptor 2                                        | ENSMUSG00000059763 | Nonsynonymous        | 10         | 2    | C685A        | R229S      |
| <i>Asrgl1</i>     | Asparaginase Like 1                                                      | ENSMUSG00000024654 | Stop-gain            | 19         | 5    | 597G         | Y199X      |
| <i>Kras</i>       | Kirsten rat sarcoma viral oncogene homolog                               | ENSMUSG00000030265 | Synonymous           | 6          | 3    | T96C         | Y32Y       |
| <i>Rhox6</i>      | Reproductive homeobox 6                                                  | ENSMUSG00000006200 | Synonymous           | X          | 2    | C153T        | L51L       |
| B230364G03Rik     | Antisense overlapping with neuromedin B receptor                         | ENSMUSG00000096963 | Frameshift insertion | 10         | 1    | 8_9insTTTA   | L3fs       |
| B430203G13Rik-201 |                                                                          | ENSMUSG00000067356 | Frameshift insertion | 12         | 1    | 64_65insCTTT | L22fs      |

**Supplementary Table 2. Properties of tested *R. capsulatus* strains**

| Bacterial strain | Growth under photosynthetic conditions <sup>a</sup> | Enzymatic activity <sup>b</sup> [s <sup>-1</sup> ] | Reactive oxygen species production by the antimycin -inhibited enzyme |
|------------------|-----------------------------------------------------|----------------------------------------------------|-----------------------------------------------------------------------|
| WT               | Ps <sup>+</sup>                                     | 140 ± 5                                            | 17%                                                                   |
| D278N            | Ps <sup>+</sup>                                     | 140 ± 6                                            | 18%                                                                   |

<sup>a</sup> Ps<sup>+</sup> indicates photosynthetic competence

<sup>b</sup> Mean and S.D. of at least five measurements

WT reference values are from Borek et al. 2015<sup>67</sup>.

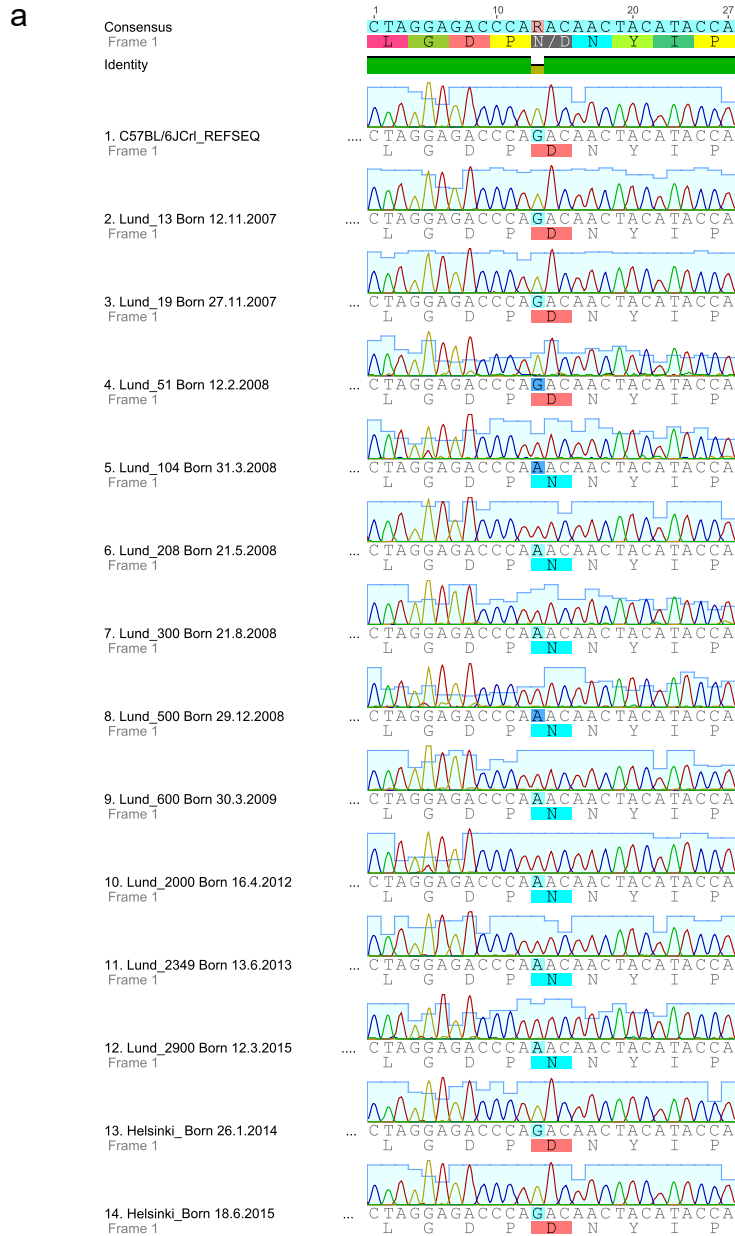

**b**

| Maternal background | Paternal background | Mouse ID | Tissue          | No. of clones | WT | D254N |
|---------------------|---------------------|----------|-----------------|---------------|----|-------|
| C57BL/6JBomTac*     | C57BL/6JBomTac*     | LU2921   | kidney          | 50            | 0  | 50    |
|                     |                     | LU2921   | skeletal muscle | 50            | 0  | 50    |
|                     |                     | LU2921   | heart           | 50            | 0  | 50    |
| C57BL/6JBomTac*     | C57BL/6JCrI         | LU164    | liver           | 50            | 0  | 50    |
|                     |                     | LU164    | kidney          | 50            | 0  | 50    |
|                     |                     | LU164    | skeletal muscle | 46            | 0  | 46    |
|                     |                     | LU164    | heart           | 50            | 0  | 50    |
| C57BL/6JCrI         | C57BL/6JBomTac*     | JKa193   | skin            | 10            | 10 | 0     |

**Supplementary Figure 1. Appearance of the *m.G14904A* (*mt-Cyb<sup>c.G760A</sup>*, *mt-Cyb<sup>p.D254N</sup>*) haplotype in the in-house Lund C57BL/BomTac colony, and analysis of its heteroplasmy. **a**, Representative Sanger sequencing chromatograms from DNA collected between 2007 and 2015. Altogether 76 mice from the colony were genotyped for the *mt-Cyb* variant from archived genotyping samples. **b**, Evaluation of heteroplasmy in somatic tissues of one mouse from the Lund colony and one F1 hybrid mouse with a Lund colony-derived C57BL/6JBomTac maternal parent. *mt-Cyb* PCR amplicons from several tissues were cloned in bacteria and the resulting plasmids sequenced.**

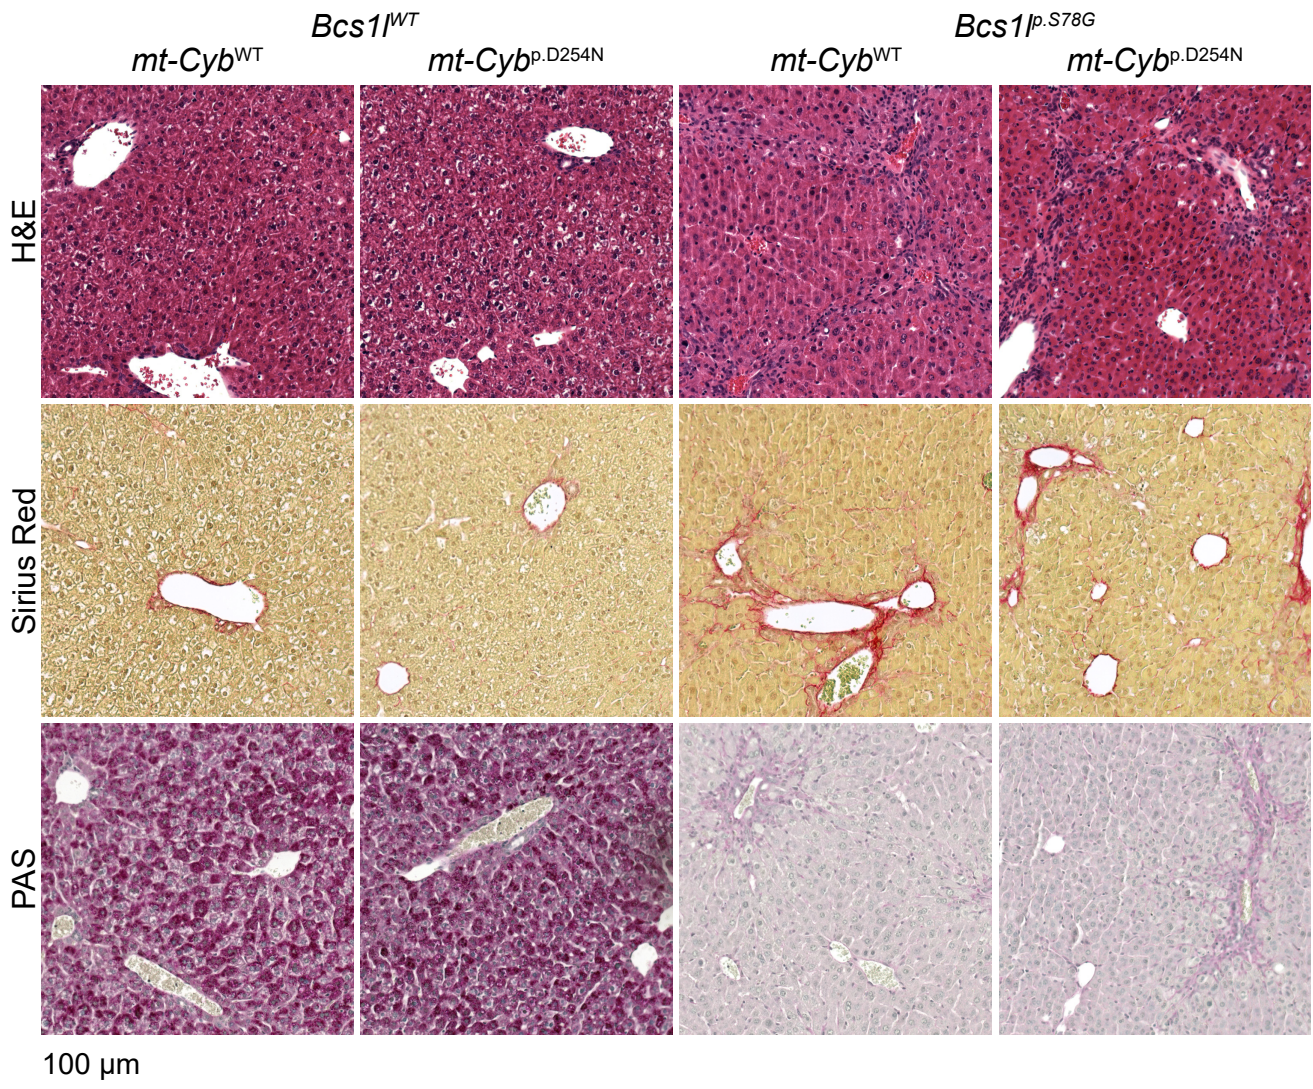

**Supplementary Figure 2. CIII deficiency-related hepatic histopathology in the two mtDNA backgrounds prior to end-stage disease. a, H&E, collagen (Sirius Red) and glycogen (PAS) stains showing hepatopathy with incipient fibrosis and glycogen depletion in the *Bcs1*<sup>p.S78G</sup> mice between P29 and P33 with and without *mt-Cyb*<sup>p.D254N</sup>.**

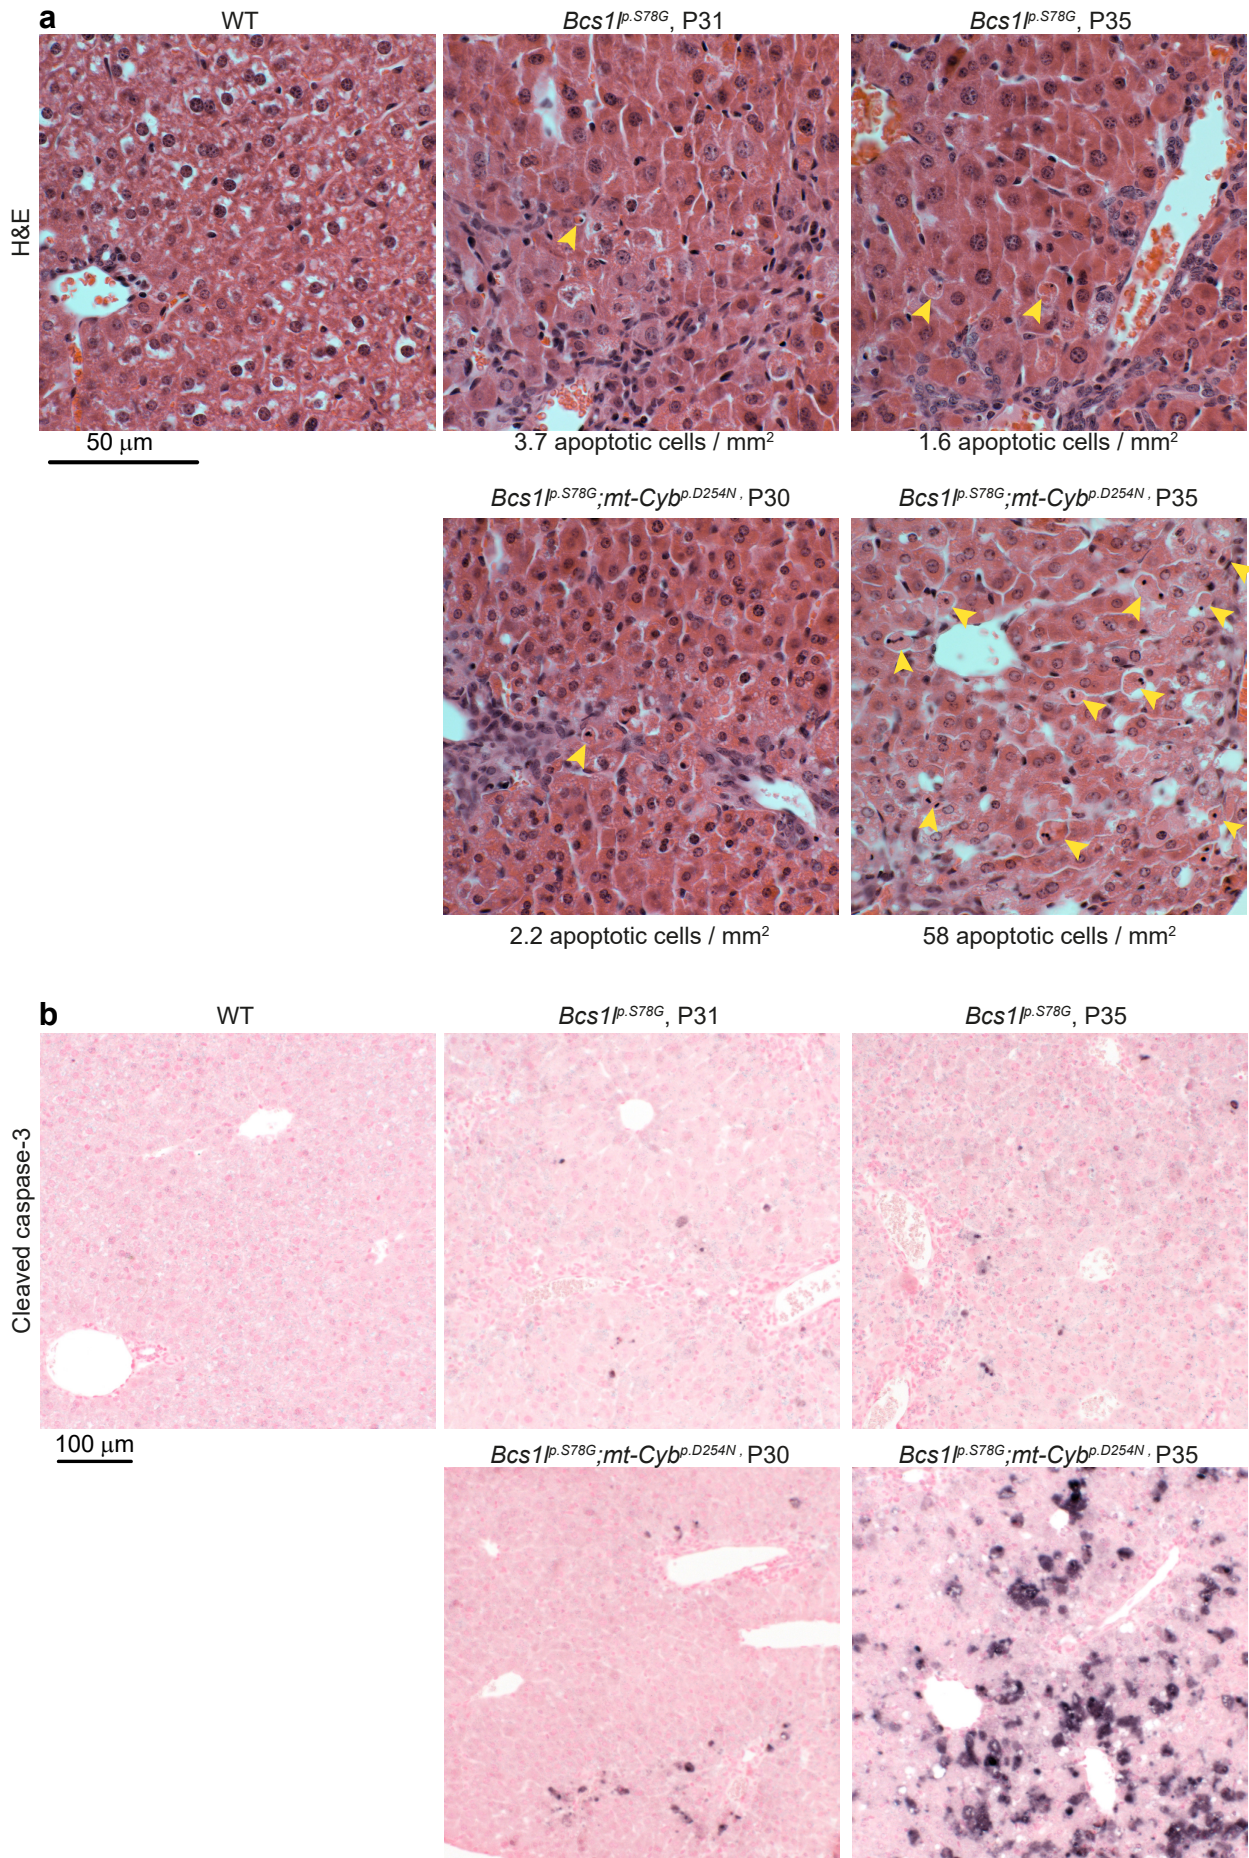

**Supplementary Figure 3. Widespread hepatocyte death in *Bcs1<sup>ip.S78G</sup>* mice carrying *mt-Cyb<sup>p.D254N</sup>*. **a**, H&E-stained liver sections with arrow heads pointing to apoptotic bodies: eosinophilic cytoplasm surrounded by halo of empty space, and fragmented or condensed nucleus. **b**, Visualization of apoptotic cells by immunostaining for cleaved caspase 3.**

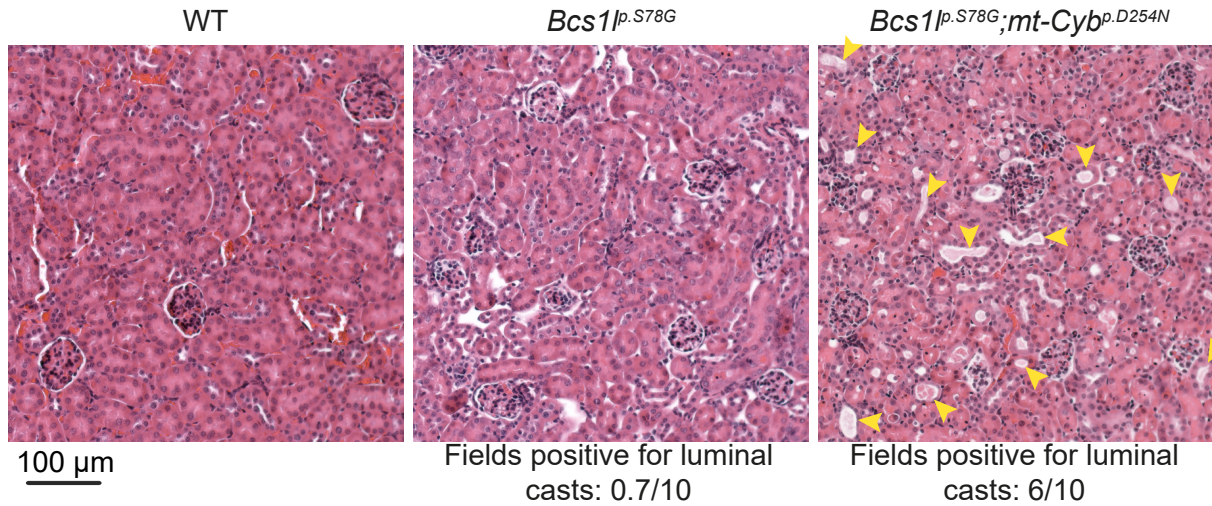

**Supplementary Figure 4. Effect of *mt-Cyb*<sup>p.D254N</sup> on renal tubulopathy in *Bcs1*<sup>p.S78G</sup> mice.** H&E-stained kidney sections show increased proximity of glomeruli in *Bcs1*<sup>p.S78G</sup> mice, suggesting loss of tubular mass. The kidneys of *Bcs1*<sup>p.S78G</sup> mice carrying *mt-Cyb*<sup>p.D254N</sup> show frequent apoptotic cells and proteinuria-associated tubular casts (arrow heads), both of which were only sporadic in the absence of *mt-Cyb*<sup>p.D254N</sup>.

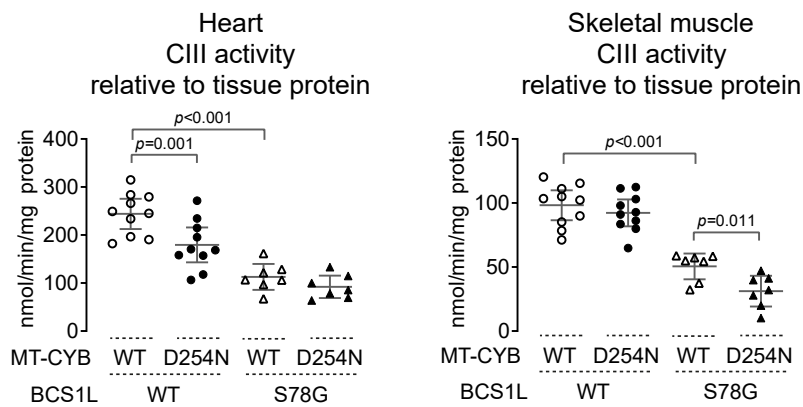

**Supplementary Figure 5, CIII activity in cardiac and skeletal muscle (quadriceps) homogenates plotted relative to tissue protein amount.** The data are from P30 cohort of mice backcrossed to C57BL/6JCr1. Activity units were calculated by using 18.5 mM<sup>-1</sup>cm<sup>-1</sup> extinction coefficient for 550 nm absorbance change and are expressed relative to 600g-supernatant tissue protein (Bradford assay, albumin equivalents).

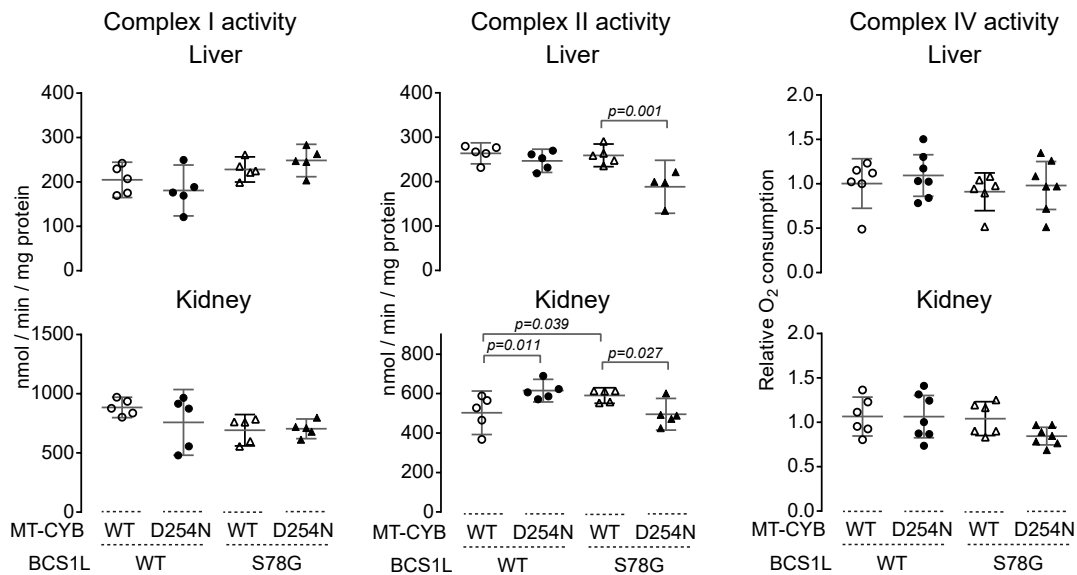

**Supplementary Figure 6. Activities of complex I, II and IV in isolated liver and kidney mitochondria from F1 hybrid mice.** CI, CII and CIII activities were measured spectrophotometrically and CIV using an oxygraph. Error bars represent 95% CI of mean.

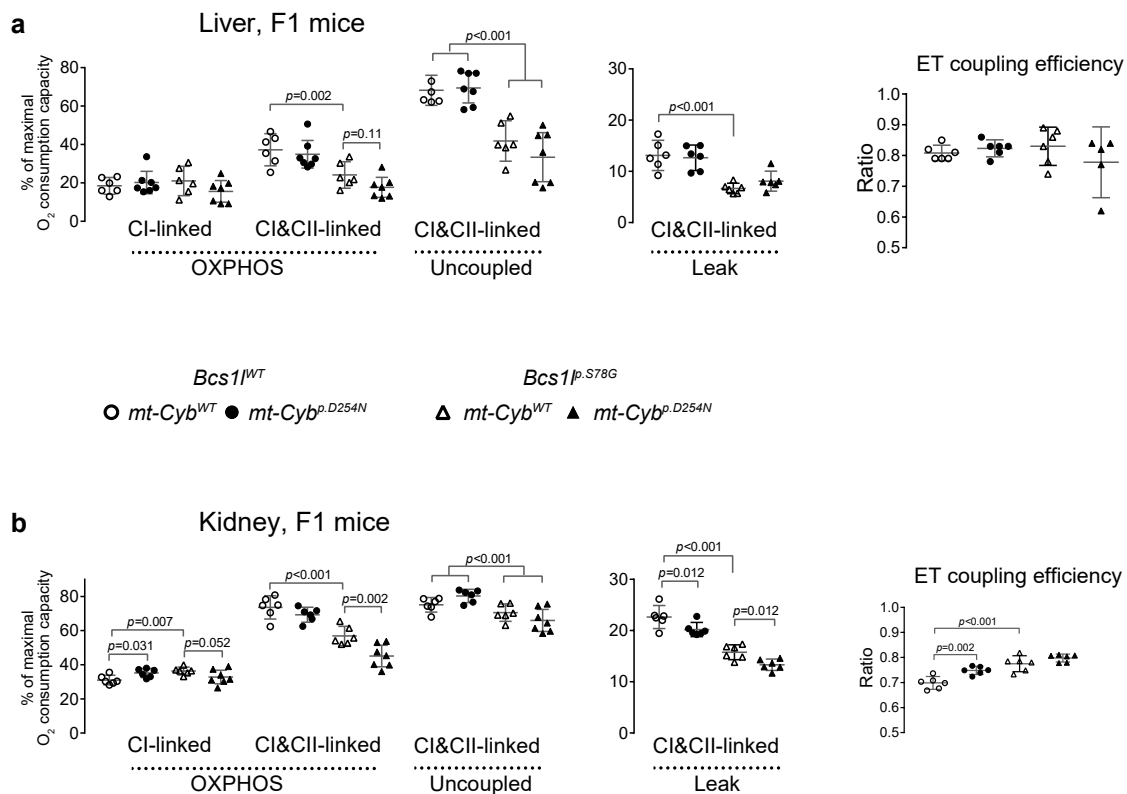

**Supplementary Figure 7. Respiriometric analysis of liver (a) and kidney (b) mitochondria from F1 hybrid mice.** Comparable analyses from a cohort of mice backcrossed to C57BL/6JCrI are shown in Fig. 4 and Supplementary Fig. 8 and 9. The oligomycin concentration and batch used here was later found to somewhat disrupt membrane potential and inhibit maximal electron transfer in liver mitochondria (see main text). Maximal oxygen consumption capacity of cytochrome c oxidase was set as a reference state for the oxygen fluxes. Error bars present 95% CI of mean.

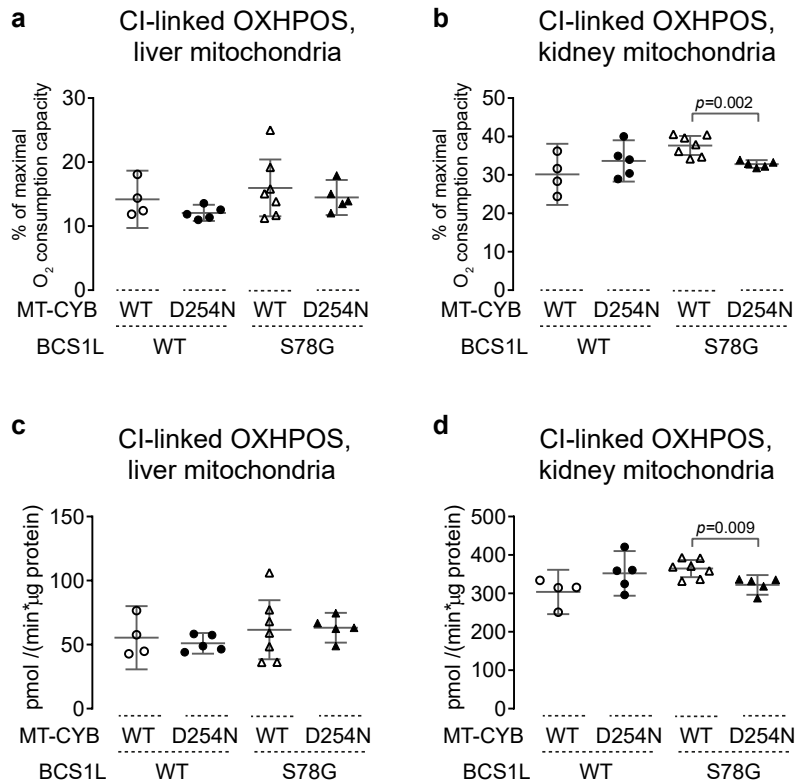

**Supplementary Figure 8. CI-linked phosphorylating respiration in mitochondria from mice backcrossed to C57BL/6JCrI.** Respiration was measured in the presence of ADP, malate, pyruvate and glutamate to drive mitochondrial NADH oxidation-dependent ATP production. **a-b**, Phosphorylating respiration relative to maximal oxygen consumption capacity (maximal oxygen consumption by CIV). **c-d**, Phosphorylating respiration relative to mitochondrial protein. Error bars present 95% CI of mean.

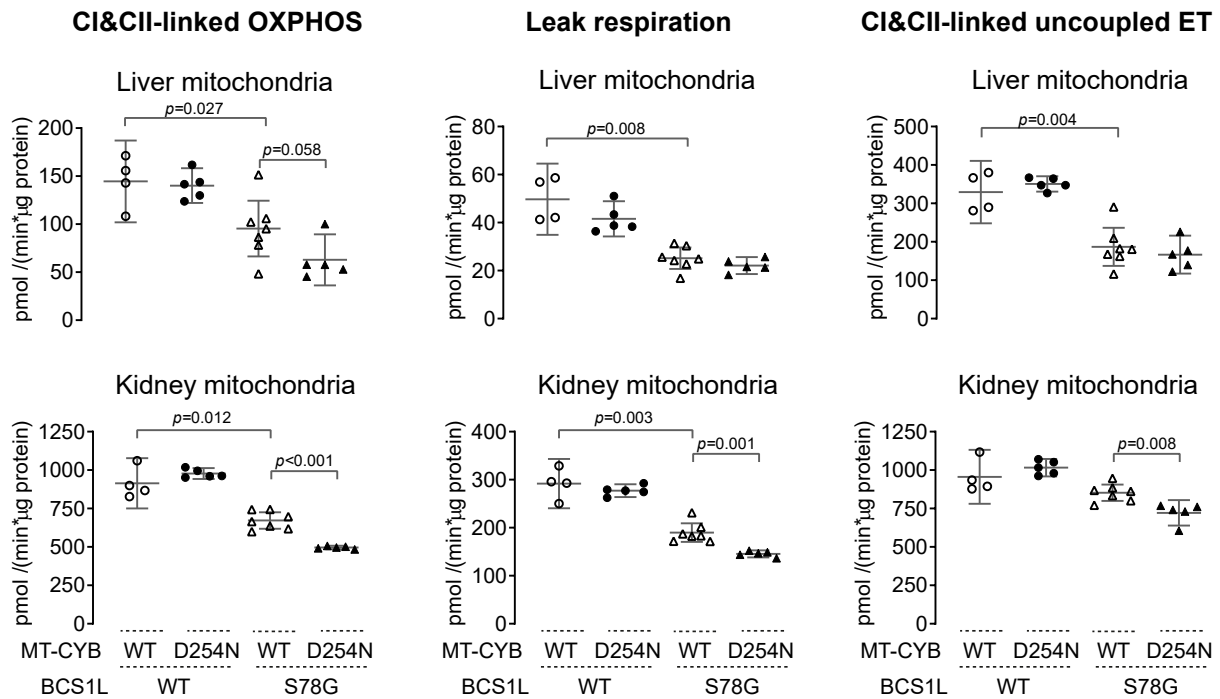

**Supplementary Figure 9. Respirometry data (Fig. 4 a-c) plotted relative to mitochondrial protein amount.** Error bars represent 95% CI of the mean.



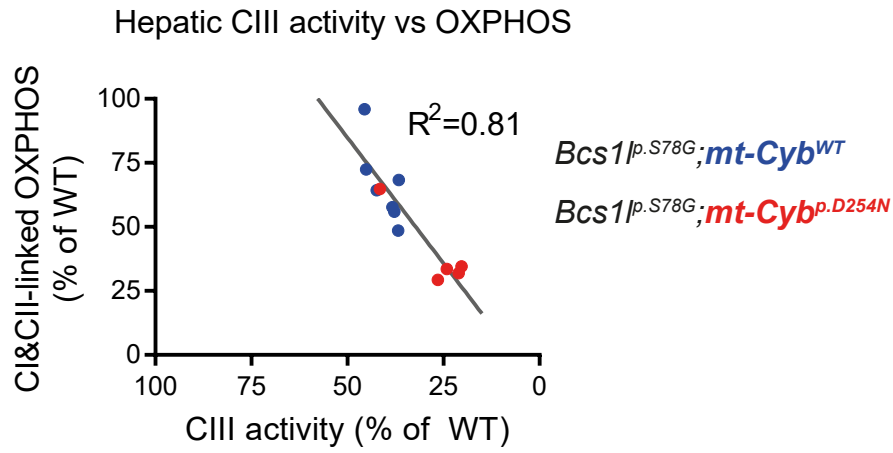

**Supplementary Figure 10. Correlation between hepatic CIII activity and maximal OXPHOS capacity.** The OXPHOS capacity (Fig. 4a) was assessed by measuring oxygen consumption by freshly isolated mitochondria in presence of malate, pyruvate, glutamate, succinate and ADP. CIII activity, from freeze-thawed mitochondria, was measured spectroscopically by monitoring decylubiquinol-mediated antimycin-sensitive reduction of cytochrome c.

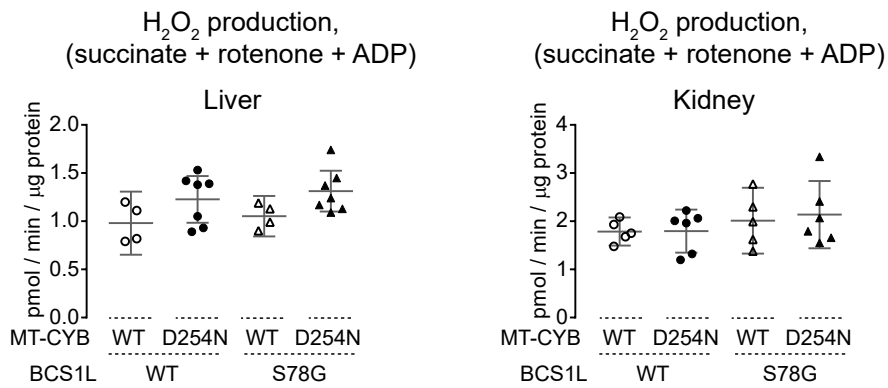

**Supplementary Figure 11.  $H_2O_2$  emission by isolated mitochondria respiring with succinate and reverse electron flow blocked by rotenone.** Isolated mitochondria were incubated in the presence of the indicated substrates and rotenone, and  $H_2O_2$  production was assessed with Amplex Red-peroxidase assay. The data are from the F1 cohort.

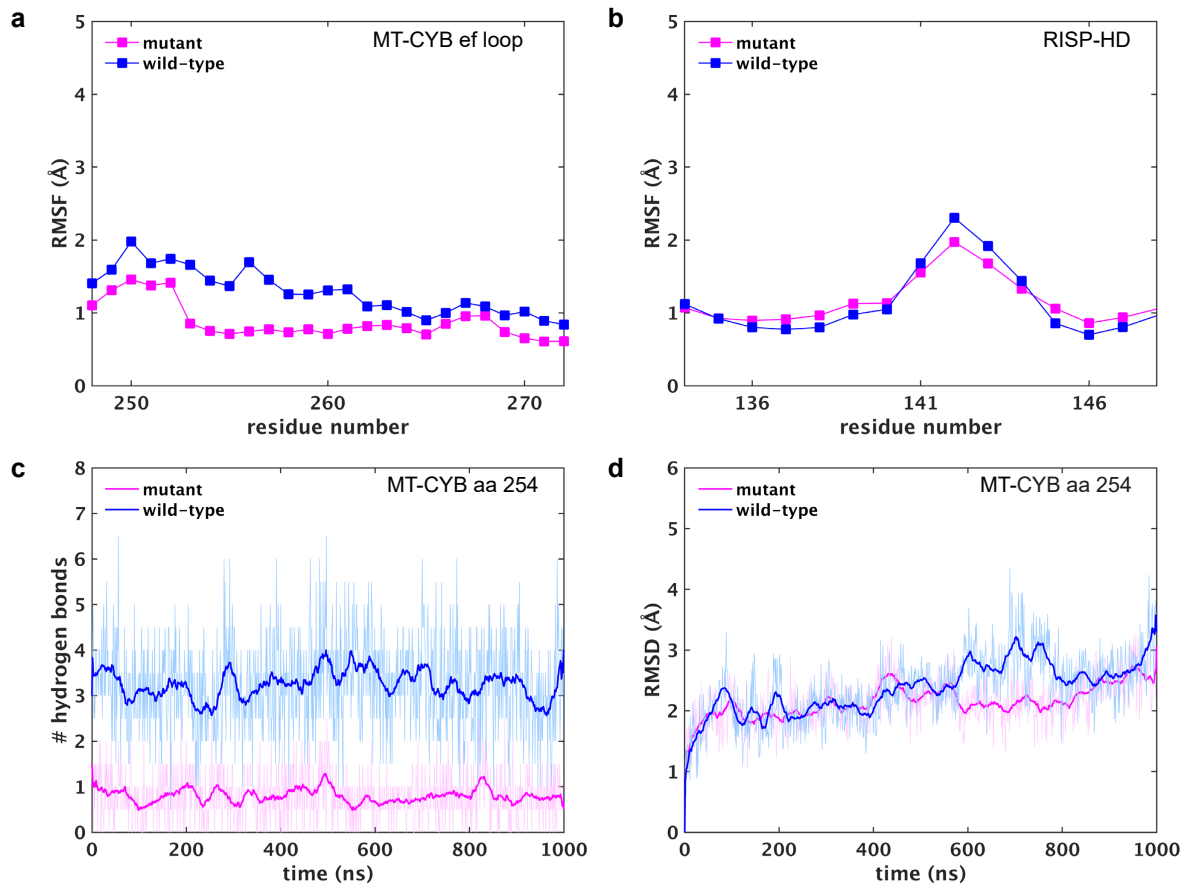

**Supplementary Figure 12. Protein dynamics when the  $Q_o$  and  $Q_i$  sites are occupied by  $QH_2$  and oxidized  $Q$ , respectively.** **a**, RMSF of the  $C\alpha$  atoms from segment T250-V270 of the MT-CYB subunit. **b**, RMSF of segment P136-W146 in the RISP subunit. **c**, Number of hydrogen bonds between the sidechain of D254/N254 (D255 in *S. cerevisiae* complex) and water molecules, with a criteria of a 3.0 Å donor-acceptor (D...A) distance and  $>160^\circ$  bond angle (D-H...A). **d**, RMSD of the D254/N254 sidechain.

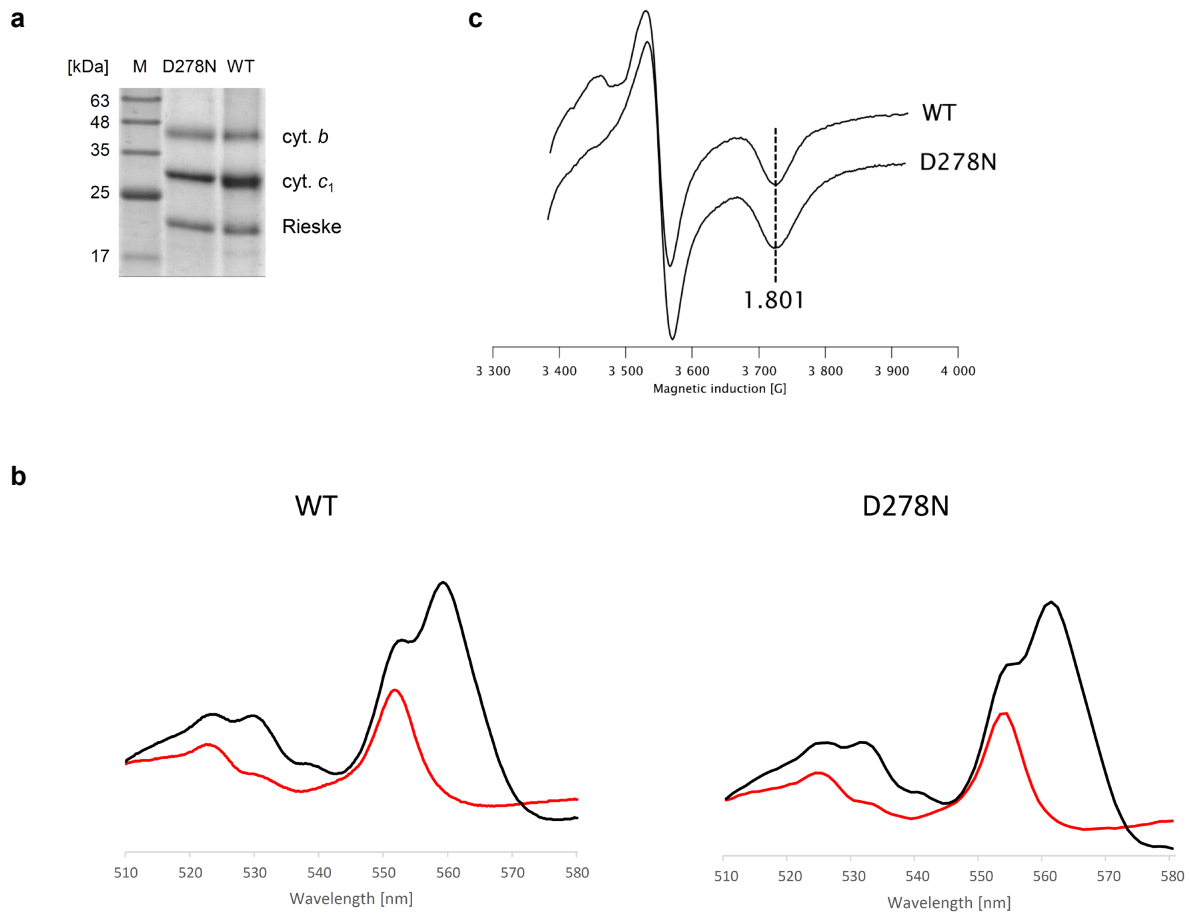

**Supplementary Figure 13. Subunit composition and spectral properties of the mutated *Rhodobacter* cytochrome  $bc_1$  complex.** **a**, SDS-PAGE analysis of the affinity-purified cytochrome  $bc_1$  complex containing D278N mutant (corresponding to *M. musculus* D254N) or wild type CYTB. **b**, Optical difference spectra of hemes *b* and *c* of purified wild type cytochrome  $bc_1$  complex (WT) and D278N) mutant. Red lines represent ascorbate-reduced minus ferricyanide-oxidized cytochrome  $bc_1$  spectra (heme *c*), black lines represent dithionite-reduced minus ferricyanide-oxidized spectra cytochrome  $bc_1$  spectra (hemes *b* and *c*). **c**, Comparison of X-band continuous wave EPR spectra of [2Fe–2S] cluster of  $bc_1$  complex in chromatophores isolated from wild type (WT) or D278N strain of *R. capsulatus*.

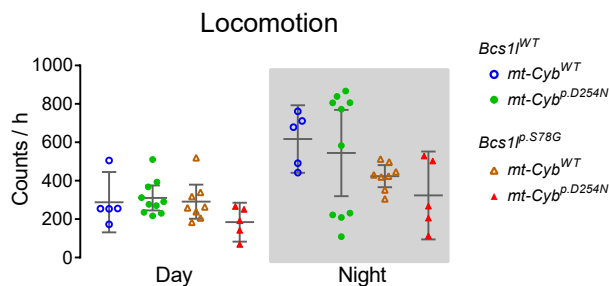

**Supplementary Figure 14. Average day and night-time movement counts recorded during indirect calorimetry (Fig.6).** Indirect calorimetry cages equipped with infrared beam detectors were used to estimate the physical activity of the mice.

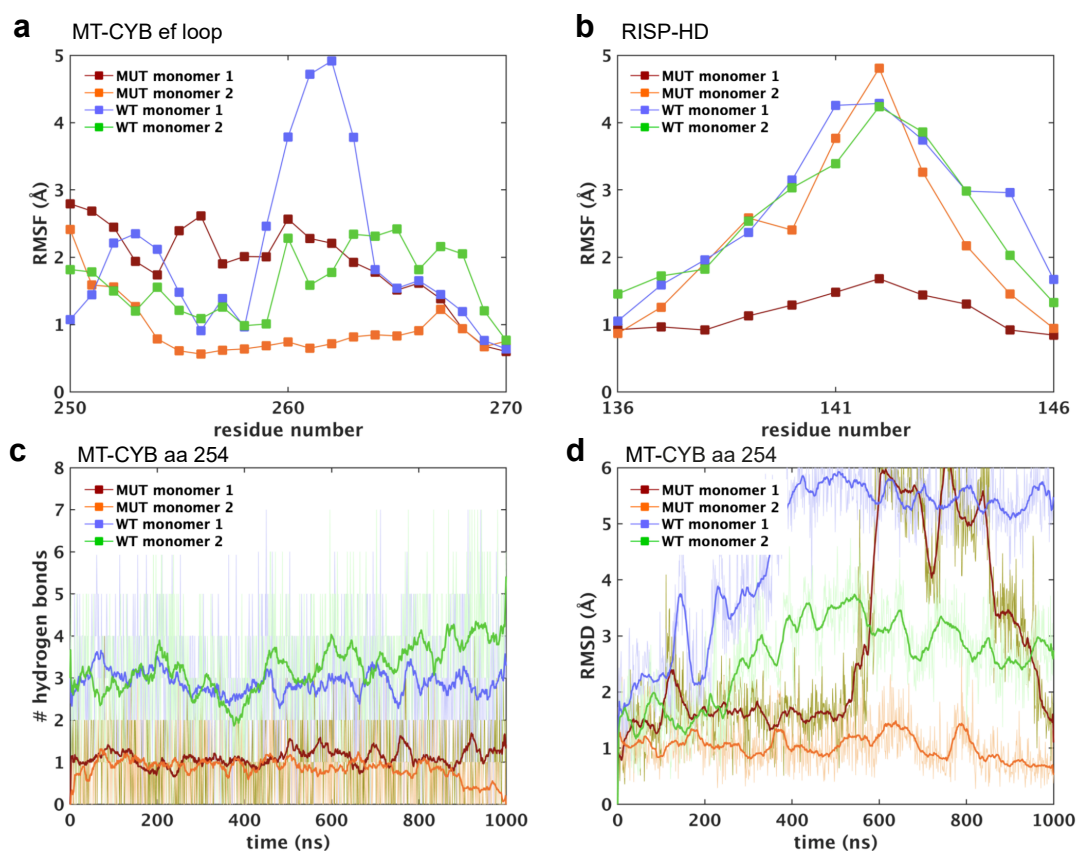

**Supplementary Figure 15. Dynamics of segments surrounding D254 from wild-type and mutant without Q molecules modeled.** The data from each monomer (1 and 2) is displayed separately, and x- and y-axis labels are same as in Fig. 5. **a**, RMSF of the C $\alpha$  atoms from segment T250-V270 of the MT-CYB subunit. **b**, RMSF of segment P136-W146 in the RISP subunit. **c**, Number of hydrogen bonds between the sidechain of D254/N254 (D255 in *S. cerevisiae* complex) and water molecules, with a criteria of a 3.0 Å donor-acceptor (D...A) distance and >160° bond angle (D-H...A). **d**, RMSD of the D254/N254 sidechain. Monomer 1 in the mutant simulation (red-brown trace in panel **a**) show RMSF equivalent to the wild-type case, which is primarily due to the short timescale fluctuation in sidechain of N254 (red-brown trace; 600 – 900 ns in panel **d**) after which it returns to its original conformation. When this part of the simulation trajectory is excluded (only first 500 ns data considered), the RMSF of ef loop segment drops to ca. 1 Å. Overall, despite some differences observed in between the two monomers of a homodimer, in part due to the limited simulation sampling, the data suggest somewhat higher mobility of anionic D254 and segments around it in contrast to neutral mutant N254 (see also Fig. 5 in main text), which may also affect the quinol/quinone binding dynamics.

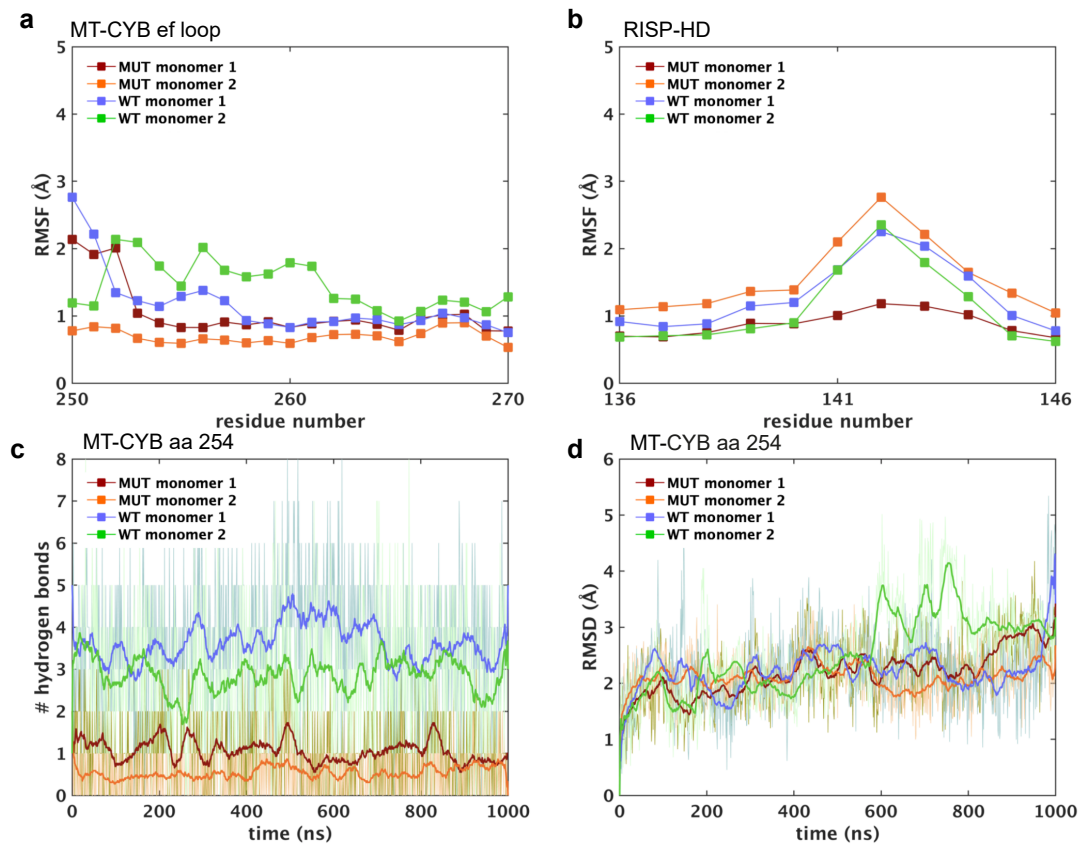

**Supplementary Figure 16. Dynamics of segments surrounding D254 from WT and mutant simulations with Q molecules modeled at the  $Q_0$  and  $Q_1$  sites.** The data from each monomer (1 and 2) is displayed separately, and x- and y-axis labels are same as in Fig. 5. In contrast to higher mobility of protein segments in simulations with empty  $Q_0/Q_1$  sites, these data reveal overall reduced mobility (see main text). Nevertheless, subtle differences exist between the WT and mutant cases (panels **a** to **d**).
